# Supplementary material for: Differences in cervical sagittal parameters and muscular function among subjects with different cervical spine alignments: a surface electromyography-based cross-sectional study
Source: PeerJ. 2024 Sep 25;12:e18107. doi: 10.7717/peerj.18107 (PMC11438432; doi:10.7717/peerj.18107)
Supplement: Supplemental Information 1 [file peerj-12-18107-s001.xlsx]

## Sheet: Sheet1
Mumber	Gender	Age	BMI	VAS	NDI	Type of curvature	COBB	SCA	T1slope	CSVA	ROM	FRRA	FRRC	FRRE	CCRNF
1	1	48	24.5	3	8	1	-14	79	15	27	45	2.07	2.1	1.74	0.86
2	0	54	21.5	3	6	1	-16	91	17	33	41	2.94	2.48	1.35	0.96
3	1	62	26.5	2	6	1	-22	82	3	41	53	3.02	2.57	1.74	0.93
4	0	65	29.5	3	8	1	-22	82	13	44	47	5.13	4.3	1.37	0.93
5	0	46	29.5	3	6	1	-19	91	12	25	45	1.36	1.2	4.22	0.51
6	1	40	27.5	2	6	1	-21	91	9	19	41	3.64	3.08	1.82	0.98
7	1	62	21.5	2	4	1	-10	83	11	41	53	2.28	1.91	3.31	0.74
8	1	52	29.5	3	8	1	-8	60	35	31	47	1.31	1.11	2.54	0.38
9	1	48	21.5	2	8	1	-5	72	28	27	59	2.8	2.32	2.66	0.82
10	1	32	22.5	2	8	1	-6	72	28	11	59	2.91	2.42	4.9	0.85
11	0	62	24.5	2	6	1	-18	81	21	41	59	4.03	3.39	2.94	0.96
12	1	56	29.5	3	8	1	-9	77	15	35	40	2.41	2.02	2.74	0.71
13	0	54	22.5	1	2	1	-6	79	18	33	26	2.26	1.88	4.67	0.66
14	1	30	26.5	2	6	1	-20	92	11	9	47	3.84	3.24	1.21	0.94
15	0	59	25.5	2	6	1	-12	82	6	38	38	1	0.87	4.55	0.29
16	0	49	22.5	1	4	1	-20	99	8	28	50	3.74	3.15	2.94	0.95
17	1	20	29.5	1	4	1	-12	73	7	-1	86	2.42	2.03	4.97	0.71
18	1	20	29.5	1	2	1	-24	111	-9	-1	38	4.09	3.53	5.22	0.99
19	0	36	21.5	3	8	1	-20	98	22	15	30	4.29	3.6	1.37	0.96
20	0	67	20.5	3	8	1	-13	86	5	46	37	1.12	0.98	0.6	0.33
21	1	71	22.5	3	6	1	-7	78	19	50	31	0.49	0.43	3.37	0.14
22	1	20	22.5	2	6	1	-5	91	16	-1	52	2.77	2.3	3.54	0.81
23	1	24	26.5	3	8	1	-6	72	28	3	59	2.91	2.42	4.01	0.85
24	0	34	27.5	3	8	1	-16	95	15	13	41	3.3	2.77	4.01	0.96
25	0	20	21.5	3	6	1	-16	95	15	-1	34	3.3	2.77	5.23	0.96
26	0	51	21.5	2	6	1	-12	79	25	30	38	4.3	3.58	2.94	0.93
27	0	23	21.5	3	8	1	-9	77	15	2	40	2.41	2.02	2.99	0.71
28	0	24	27.5	2	6	1	-14	90	2	3	53	2.46	2.07	2.48	0.72
29	1	67	29.5	2	4	1	-8	89	4	46	40	2.04	1.71	4.95	0.6
30	0	65	29.5	3	8	1	-7	75	50	44	40	4.07	3.37	3.03	0.95
31	1	48	28.5	3	8	1	-14	79	15	27	45	2.49	2.1	3.57	0.73
32	0	54	21.5	3	6	1	-16	91	17	33	41	2.94	2.48	3.67	0.86
33	1	62	23.5	2	6	1	-22	82	3	41	53	3.02	2.57	6.24	0.88
34	0	65	22.5	3	8	1	-22	82	13	44	47	5.13	4.3	1.65	0.95
35	0	46	24.5	3	6	1	-19	91	12	25	45	1.36	1.2	4.43	0.4
36	1	40	22.5	2	6	1	-21	91	9	19	41	3.64	3.08	2.77	0.96
37	1	62	20.5	2	4	1	-10	83	11	41	53	2.28	1.91	1.59	0.67
38	1	52	22.5	3	8	1	-8	60	35	31	47	1.31	1.11	3.41	0.38
39	1	48	20.5	2	8	1	-5	72	28	27	59	2.8	2.32	3.54	0.82
40	1	32	29.5	2	8	1	-6	72	28	11	59	2.91	2.42	4.9	0.85
41	0	62	23.5	2	6	1	-18	81	21	41	59	4.03	3.39	2.94	0.96
42	1	56	22.5	3	8	1	-9	77	15	35	40	2.41	2.02	2.74	0.71
43	0	54	20.5	1	2	1	-6	79	18	33	26	2.26	1.88	4.67	0.66
44	1	30	28.5	2	4	1	-20	92	11	9	47	3.84	3.24	1.21	0.93
45	0	59	24.5	2	6	1	-12	82	6	38	38	1	0.87	4.55	0.29
46	0	49	24.5	1	4	1	-20	99	8	28	50	3.74	3.15	2.94	0.98
47	1	20	26.5	1	4	1	-12	73	7	-1	86	2.42	2.03	4.97	0.71
48	1	19	24.5	1	2	1	-26	111	-9	-2	38	4.09	3.53	5.22	0.98
49	0	36	23.5	3	8	1	-20	98	22	15	30	4.29	3.6	1.37	0.99
50	0	67	20.5	3	8	1	-13	86	5	46	37	1.12	0.98	0.6	0.33
51	1	71	26.5	3	6	1	-7	78	19	50	31	0.49	0.43	3.37	0.14
52	1	20	24.5	2	6	1	-5	91	16	-1	52	2.77	2.3	3.54	0.81
53	1	24	22.5	3	8	1	-6	72	28	3	59	2.91	2.42	4.01	0.85
54	0	34	29.5	3	8	1	-16	95	15	13	41	3.3	2.77	4.01	0.96
55	0	20	28.5	3	6	1	-16	95	15	-1	34	3.3	2.77	5.23	0.96
56	0	51	21.5	2	6	1	-12	79	25	30	38	4.3	3.58	2.94	0.94
57	0	23	25.5	3	8	1	-9	77	15	2	40	2.41	2.02	2.99	0.71
58	0	24	21.5	2	6	1	-14	90	2	3	53	2.46	2.07	2.48	0.72
59	1	67	20.5	2	4	1	-8	89	4	46	40	2.04	1.71	4.95	0.6
60	0	65	29.5	3	8	1	-7	75	50	44	40	4.07	3.37	5.23	0.93
61	0	51	21.5	2	6	1	-12	79	25	30	38	4.3	3.58	2.94	0.93
62	0	23	25.5	3	8	1	-9	77	15	2	40	2.41	2.02	2.99	0.71
63	0	24	21.5	2	6	1	-14	90	2	3	53	2.46	2.07	2.48	0.72
64	1	67	20.5	2	4	1	-8	89	4	46	40	2.04	1.71	4.95	0.6
65	0	65	29.5	3	8	1	-7	75	50	44	40	4.07	3.37	5.23	0.95
66	0	51	21.5	2	6	1	-12	79	25	30	38	4.3	3.58	2.94	0.98
67	0	23	21.5	3	8	1	-9	77	15	2	40	2.41	2.02	2.99	0.71
68	0	24	27.5	2	6	1	-14	90	2	3	53	2.46	2.07	2.48	0.72
69	1	67	29.5	2	4	1	-8	89	4	46	40	2.04	1.71	4.95	0.6
70	0	65	29.5	3	8	1	-7	75	50	44	40	4.07	3.37	3.51	0.95
71	1	62	26.5	3	6	2	22	82	3	39	53	2.72	3.47	1.74	0.93
72	0	65	29.5	3	8	2	22	82	13	42	47	1.72	1.62	1.37	0.93
73	1	40	27.5	3	8	2	21	91	9	17	41	2.73	2.05	1.82	0.98
74	1	48	21.5	3	6	2	5	72	28	25	59	2.36	2.2	2.66	0.69
75	1	30	26.5	3	6	2	20	92	11	7	47	2.18	1.88	1.52	0.98
76	0	59	25.5	3	8	2	12	82	6	36	38	2.23	2.24	1.03	0.74
77	0	49	22.5	3	6	2	20	99	8	26	50	2.63	3.16	3.79	0.98
78	1	19	29.5	3	6	2	41	111	-9	-4	38	2.19	1.33	1.01	0.98
79	0	36	21.5	3	10	2	20	98	22	13	30	2.98	2.56	1.3	0.93
80	1	20	22.5	3	6	2	5	91	16	-3	52	2.97	1.84	2.96	0.76
81	0	21	21.1	3	8	2	16	95	15	-2	34	2.84	2.3	1.27	0.15
82	0	59	27.1	2	4	2	11	85	13	36	42	1.04	1.86	1.17	0.31
83	0	61	26.5	3	18	2	16	91	4	38	53	1.37	1.02	8.32	0.87
84	1	62	23.5	3	8	2	22	82	3	39	53	2.23	1.65	1.73	0.84
85	0	65	22.5	3	10	2	22	82	13	42	47	1.51	1.82	4.43	0.84
86	1	40	22.5	3	10	2	21	91	9	17	41	2.56	2.91	1.76	0.97
87	1	48	20.5	3	8	2	5	72	28	25	59	2.64	1.99	1.65	0.72
88	1	30	28.5	3	8	2	20	92	11	7	47	1.87	2.7	7.23	0.97
89	0	59	24.5	3	8	2	12	82	6	36	38	1.39	1.55	3.69	0.88
90	0	49	24.5	3	6	2	20	99	8	26	50	2.47	4.46	2.39	0.97
91	1	19	24.5	3	6	2	41	111	-9	-4	38	2.85	1.58	1.06	0.97
92	0	36	23.5	3	8	2	20	98	22	13	30	2.29	2	1.29	0.84
93	1	20	24.5	3	6	2	5	91	16	-3	52	3.91	2.29	0.67	0.7
94	0	21	21.1	3	12	2	16	95	15	-2	34	1.8	2.34	5.93	0.3
95	0	59	27.1	2	4	2	11	85	13	36	42	1.41	1.38	1.5	0.81
96	0	61	26.5	3	6	2	16	91	4	38	53	2.59	2.82	1.82	0.9
97	0	53	28.5	3	8	2	22	87	6	30	46	2.5	4.69	4.17	0.99
98	0	59	28.8	3	10	2	15	87	7	36	47	1.64	3.4	3.23	0.89
99	1	36	28.4	3	10	2	23	91	11	13	34	1.85	3.29	3.14	0.87
100	1	29	23	2	4	2	17	86	11	6	48	0.92	0.57	1.15	0.33
101	1	21	21.1	3	6	2	13	91	13	-2	41	1.27	2.23	2.37	0.65
102	0	32	25.3	3	8	2	22	89	19	9	49	1.6	2.53	2.59	0.72
103	1	38	23.4	3	12	2	23	92	11	15	48	2.35	5.1	4.46	0.94
104	1	51	20.8	3	6	2	12	87	10	28	43	1.72	3.94	3.62	0.99
105	0	19	18.3	3	10	2	16	89	7	-4	42	1.74	3.68	3.43	0.94
106	0	62	26.7	3	6	2	9	92	3	39	49	1.51	3.5	3.29	0.9
107	1	53	25.3	3	8	2	13	89	11	30	44	1.33	2.46	2.54	0.7
108	1	50	27	3	8	2	24	90	12	27	50	2.27	4.7	4.17	0.99
109	0	27	22.9	3	6	2	16	87	12	4	47	1.66	3.32	3.17	0.87
110	1	49	27.1	3	8	2	21	88	11	26	45	1.44	2.08	2.26	0.63
111	0	48	26.2	2	8	2	11	89	14	25	43	0.98	1.44	1.79	0.49
112	1	29	23.3	3	12	2	27	89	13	6	41	2.31	4.5	4.03	0.95
113	0	53	30.8	2	8	2	11	86	11	30	42	0.98	1.4	1.76	0.49
114	0	45	28	3	14	2	27	90	5	24	52	2.58	5.58	4.82	0.98
115	1	62	21.5	3	10	3	10	83	11	35	53	1.91	1.77	3.31	0.74
116	1	52	29.5	3	6	3	8	60	35	25	47	3.81	2.63	2.54	0.9
117	0	62	24.5	3	10	3	18	81	21	35	59	3.37	2.38	1.44	0.77
118	0	54	22.5	3	6	3	6	79	18	27	26	0.97	6.09	1.21	0.69
119	0	20	21.5	3	10	3	16	95	15	-7	34	3.48	1.89	1.47	0.86
120	0	23	21.5	3	6	3	9	77	15	-4	40	2.81	1.16	1.39	0.95
121	1	67	29.5	3	12	3	8	89	4	40	40	2.24	6.42	2.62	0.94
122	1	62	20.5	3	8	3	10	83	11	35	53	2.01	1.18	2.97	0.88
123	1	52	22.5	3	8	3	8	60	7	25	47	1.77	1.76	7.88	0.69
124	0	62	23.5	3	8	3	18	81	3	35	59	1.98	1.03	1.78	0.97
125	0	54	20.5	3	6	3	6	79	4	27	26	3.27	1.71	1.1	0.72
126	0	20	28.5	3	6	3	16	95	9	-7	34	2.93	1.99	1.47	0.82
127	0	23	25.5	3	6	3	9	77	9	-4	40	3.29	0.72	1.51	0.85
128	1	67	20.5	3	6	3	8	89	7	40	40	2.81	1.77	1.69	0.63
129	0	28	18.4	3	6	3	23	80	6	1	33	2.63	2.49	3.94	0.94
130	1	61	23.5	3	8	3	10	84	35	34	40	1.36	2.06	2.75	0.94
131	0	24	24.5	3	6	3	6	77	21	-3	34	1.07	1.63	2.24	0.76
132	0	19	18.9	3	6	3	12	78	18	-8	31	1.55	1.86	3.1	0.98
133	0	30	27.5	3	8	3	8	83	15	3	47	1.28	2.25	2.64	0.9
134	0	35	27.1	3	10	3	21	83	15	8	45	1.98	2.89	3.71	0.94
135	1	32	24.7	3	6	3	9	85	4	5	28	1.22	1.56	2.45	0.83
136	1	50	26.3	3	8	3	6	88	11	23	36	1.03	1.67	2.16	0.73
137	0	77	27.5	3	10	3	14	77	19	50	31	1.72	1.96	3.42	0.98
138	1	42	21.8	3	6	3	17	79	2	15	40	1.91	2.48	3.73	0.93
139	0	58	25.3	3	8	3	5	82	-5	31	40	0.97	1.8	2.07	0.7
140	0	66	18.4	3	6	3	17	78	6	39	44	1.94	2.62	3.79	0.93
141	0	20	19.9	3	8	3	11	80	17	-7	30	1.23	1.7	2.41	0.82
142	0	74	19.3	3	6	3	11	82	4	47	40	1.49	2.13	3	0.99
143	0	40	20.2	3	10	3	15	77	21	13	42	2.07	2.43	4.21	0.96
144	0	60	27.3	3	6	3	8	78	18	33	34	1.41	1.72	2.96	0.94
145	1	42	29.2	3	10	3	14	83	15	15	48	1.73	2.57	3.47	0.98
146	1	66	20	3	8	3	9	77	9	39	38	0.98	1.89	1.91	0.65
147	1	51	19.8	3	8	3	9	85	28	24	48	1.22	2.29	2.47	0.84
148	0	53	27	3	6	3	9	85	11	26	37	1.15	1.9	2.31	0.79
149	1	35	30.3	3	6	3	11	90	6	8	43	1.12	2.21	2.16	0.73
150	0	40	25.5	3	8	3	11	78	8	13	48	1.34	2.42	2.64	0.9
151	1	32	24.1	3	6	3	15	82	6	5	39	1.74	2.26	3.45	0.98
152	0	68	23.9	2	4	3	0	84	22	41	30	0.56	1.1	1.33	0.45
153	0	56	25.4	3	8	3	5	80	13	35	41	1.04	1.83	2.23	0.76
154	1	54	21.5	3	6	4	16	91	17	14	41	2.36	2.46	1.35	0.96
155	1	20	29.5	3	6	4	12	73	7	-6	86	2.34	2.88	1.65	0.74
156	0	67	20.5	3	6	4	13	86	5	31	37	2.4	1.84	0.33	0.96
157	1	71	22.5	3	6	4	7	78	19	35	31	2.49	3.1	1.55	0.99
158	0	24	27.5	3	6	4	14	90	2	-2	53	1.62	1.16	3.33	0.87
159	0	26	24.1	2	4	4	15	95	-5	0	42	1.75	1.35	1.3	0.5
160	1	59	26.7	3	8	4	9	85	6	15	41	1.8	2.9	1.22	0.81
161	0	54	21.5	3	6	4	16	91	17	14	41	2.56	1.56	2.05	0.9
162	1	20	26.5	3	8	4	12	73	7	-6	86	3.9	1.43	1.15	0.88
163	0	67	20.5	3	10	4	13	86	5	11	37	3.99	1.71	1.49	0.9
164	1	71	26.5	3	10	4	7	78	19	15	31	2.5	1.38	2.99	0.63
165	0	24	21.5	3	12	4	14	90	2	-2	53	2.65	4.7	3.46	0.85
166	0	26	24.1	2	4	4	15	95	-5	-10	45	1.19	1.41	1.35	0.64
167	1	59	26.7	2	8	4	9	85	6	15	41	1.06	1.37	1.7	0.33
168	1	45	23.3	3	6	4	11	75	10	9	52	2.01	1.47	2.73	0.54
169	1	42	27.8	3	6	4	8	85	9	6	63	1.8	1.37	2.47	0.46
170	1	50	22.8	3	10	4	15	87	5	14	52	2.38	1.69	3.22	0.67
171	1	31	32.7	3	6	4	11	85	4	-5	68	2.07	1.51	2.81	0.56
172	0	53	19.8	3	10	4	12	79	7	10	36	2.25	1.65	3.05	0.61
173	0	37	22.5	3	8	4	11	82	1	1	38	1.99	1.46	2.7	0.54
174	1	38	30.7	3	6	4	10	78	6	2	64	2.21	1.67	3.02	0.57
175	0	25	29.3	3	6	4	13	72	7	-4	51	2.44	1.8	3.32	0.66
176	0	72	19.3	3	6	4	9	79	8	16	46	1.76	1.31	2.4	0.47
177	0	46	22.5	3	8	4	11	72	12	10	41	1.91	1.39	2.59	0.52
178	1	30	29.2	3	8	4	11	78	2	-6	36	1.94	1.41	2.63	0.53
179	0	49	32.9	3	6	4	6	81	9	13	35	1.67	1.29	2.29	0.42
180	0	64	34.3	3	6	4	9	79	7	18	61	1.79	1.34	2.44	0.47
181	0	45	28.6	3	6	4	15	74	3	9	35	2.3	1.62	3.09	0.65
182	0	60	26.6	3	6	4	16	82	4	13	41	2.44	1.72	3.29	0.69
183	0	19	27.2	3	6	4	11	79	9	-7	30	2.14	1.59	2.92	0.57
184	1	62	21	3	6	4	10	80	9	15	26	1.89	1.38	2.56	0.51
185	0	20	18.4	3	10	4	11	82	7	-5	50	2.25	1.67	3.07	0.6
186	1	65	27.6	3	10	4	17	85	6	15	74	2.62	1.86	3.54	0.74
187	1	46	26	3	6	4	12	78	6	10	18	2	1.44	2.7	0.55
188	1	61	27.5	3	10	4	19	76	10	14	13	2.76	1.93	3.72	0.8
189	0	41	23.6	3	6	4	20	82	8	5	45	2.67	1.83	3.58	0.79
190	0	70	28.4	3	10	4	13	82	8	20	51	2.28	1.67	3.1	0.62
191	1	77	18.3	3	10	4	13	79	9	19	34	2.24	1.61	3.04	0.63
192	0	47	20.5	3	8	4	13	80	4	11	36	2.05	1.46	2.77	0.58
193	0	42	27.7	3	6	4	11	80	11	6	70	2.04	1.49	2.77	0.56
194	0	38	27.1	3	8	4	12	75	5	2	55	2.03	1.46	2.75	0.57
